# 1 **Human-genome gut-microbiome interaction in Parkinson's disease**

2

3 ZACHARY D. WALLEN<sup>1</sup>, WILLIAM J. STONE<sup>1</sup>, STEWART A. FACTOR<sup>2</sup>, ERIC MOLHO<sup>3</sup>, CYRUS  
4 P. ZABETIAN<sup>4</sup>, DAVID G. STANDAERT<sup>1</sup> AND HAYDEH PAYAMI<sup>1\*</sup>

5 <sup>1</sup> Department of Neurology, University of Alabama at Birmingham, Birmingham, AL, 35294, USA

6 <sup>2</sup> Department of Neurology, Emory University School of Medicine, Atlanta, GA, 30322, USA

7 <sup>3</sup> Department of Neurology, Albany Medical College, Albany, NY, 12208, USA

8 <sup>4</sup> VA Puget Sound Health Care System and Department of Neurology, University of Washington, Seattle,  
9 WA, 98108, USA

10

11 \*Correspondence and material request should be addressed to Haydeh Payami [haydehpayami@uabmc.edu](mailto:haydehpayami@uabmc.edu)

12

13

## 14 **Abstract**

15 The causes of complex diseases remain an enigma despite decades of epidemiologic research on  
16 environmental risks and genome-wide studies that have uncovered tens or hundreds of susceptibility loci  
17 for each disease. We hypothesize that the microbiome is the missing link. Genetic studies have shown that  
18 overexpression of alpha-synuclein, a key pathological protein in Parkinson's disease (PD), can cause  
19 familial PD and variants at alpha-synuclein locus confer risk of idiopathic PD. Recently, dysbiosis of gut  
20 microbiome in PD was identified: altered abundances of three microbial clusters were found, one of  
21 which was composed of opportunistic pathogens. Using two large datasets, we show that the  
22 overabundance of opportunistic pathogens in PD gut is influenced by the host genotype at the alpha-  
23 synuclein locus, and that the variants responsible modulate alpha-synuclein expression. This is the first  
24 demonstration of interaction between genetic factors in the human genome and the dysbiosis of gut  
25 microbiome in PD.

## 26 **Introduction**

27 Parkinson's disease (PD) affects over 6 million people world-wide, having doubled in one decade, and  
28 continues to rapidly increase in prevalence with the aging of the world population<sup>1</sup>. PD is a progressive  
29 degenerative disease which affects the brain, the peripheral nervous system, and the gastrointestinal tract,  
30 causing progressive, debilitating movement disorders, gastrointestinal and autonomic dysfunction, sleep  
31 disorders, and cognitive impairment. Currently there is no prevention, cure or treatment known to slow  
32 the progression of the disease.

33 Like other common late-onset disorders, PD has Mendelian forms caused by rare mutations, but the vast  
34 majority of cases remain idiopathic. Both genetic and environmental risk factors have been identified<sup>2-4</sup>,  
35 but none have large enough effect sizes individually or in combination to fully encapsulate disease risk<sup>5-8</sup>.  
36 The triggers that initiate onset of PD pathology are unknown.

37 There is a connection between PD and the gastrointestinal tract<sup>9,10</sup> and the gut microbiome<sup>11</sup>. The gut  
38 microbiome is a relatively new and increasingly active area of research in human disease<sup>12-14</sup>. Studies on  
39 PD have consistently found altered gut microbiome, with depletion of short-chain fatty acid (SCFA)  
40 producing bacteria, and enrichment of *Lactobacillus* and *Bifidobacterium*<sup>11,15,16</sup>. Most studies to date have  
41 been modest in size, and therefore have examined mostly common microorganisms. No study so far has  
42 had the power to explore interactions between gut microorganisms and genetic risk factors for PD.  
43 Demonstrating interaction is statistically challenging because data are parsed into smaller groups, which

44 drastically reduces effective sample size and power. We recently reported a microbiome-wide association  
45 study in PD, using two large datasets and internal replication, which enabled investigation of less  
46 common taxa not reported before<sup>11</sup>. In these datasets, reduced SCFA-producing bacteria and elevated  
47 *Lactobacillus* and *Bifidobacterium* were robustly confirmed. In addition, a significant increase was  
48 detected in the relative abundance of a poly-microbial cluster of opportunistic pathogens, including  
49 *Corynebacterium\_1* (*C. amycolatum*, *C. lactis*), *Porphyromonas* (*P. asaccharolytica*, *P. bennonis*, *P.*  
50 *somerae*, *P. uenonis*), and *Prevotella* (*P. bivia*, *P. buccalis*, *P. disiens*, *P. timonensis*). These are  
51 commensal bacteria with normally low abundance in the gut, but they can cause infections in  
52 opportunistic situations such as a compromised immune system<sup>11</sup>.

53 Overabundance of opportunistic pathogens in PD gut was of interest because it harks back to the  
54 hypothesis advanced by Professor Heiko Braak which proposes that in non-familial forms of PD, the  
55 disease is triggered by an unknown pathogen in the gut and spreads to the brain<sup>17,18</sup>. Braak's hypothesis  
56 was based on pathological studies of postmortem human brain, stained using antibodies to alpha-  
57 synuclein. Misfolded alpha-synuclein, the pathologic hallmark of PD, has been seen to form in enteric  
58 neurons early in disease<sup>19-21</sup>, and has been shown to propagate in a prion-like manner from the gut to the  
59 brain in animal models<sup>22</sup>. The gene that encodes alpha-synuclein is *SNCA*. *SNCA* gene multiplication  
60 results in drastic over expression of alpha-synuclein and causes Mendelian autosomal dominant PD.  
61 Variants in the *SNCA* region are associated with risk of idiopathic PD<sup>23</sup>, and are expression quantitative  
62 trait loci (eQTL) associated with expression levels of *SNCA*<sup>24-26</sup>. Increased alpha-synuclein expression  
63 has been noted with infections unrelated to PD<sup>27,28</sup>. We hypothesized that if opportunistic pathogens are  
64 involved in disease pathogenesis, there might be an interaction between genetic variants in *SNCA* region  
65 and dysbiosis of the gut in PD.

## 66 Results

67 The two case-control cohorts used here are those previously employed by Wallen et al. to characterize the  
68 PD gut microbiome<sup>11</sup>. Here, we generated and added genotype data to investigate interactions. The  
69 sample size for the present analysis was 199 PD and 117 controls in dataset 1, and 312 PD and 174  
70 controls in dataset 2. All samples had complete genotypes, 16S microbiome data, and metadata  
71 (Supplementary Table 1).

72 We defined the boundaries of the *SNCA* region such that it would encompass known *cis*-eQTLs for  
73 *SNCA*. Using GTEx eQTL database, we defined the boundaries as ch4:88.9Mb, downstream of 3' *SNCA*,  
74 and ch4:90.6 Mb, upstream of 5' *SNCA*. In our genome-wide genotype data (see Methods), we had 2,627

75 single nucleotide polymorphisms (SNPs) that mapped to this region, had minor allele frequency (MAF)  
76  $>0.1$ , imputation quality score  $r^2 > 0.8$ , and were in common between the two datasets being studied here.

77 The taxa examined were grouped and analyzed at genus/subgenus/clade level as *Corynebacterium\_1* (*C.*  
78 *amycolatum*, *C. Lactis*), *Porphyromonas* (*P. asaccharolytica*, *P. bennonis*, *P. somerae*, *P. uenonis*), and  
79 *Prevotella* (*P. bivia*, *P. buccalis*, *P. disiens*, *P. timonensis*). For simplicity, we will refer to the three  
80 microbial groups as taxa. As we have previously shown, the abundance of these taxa are elevated in PD  
81 vs. control. These findings were replicated in the two datasets (Table 1), verified by two statistical  
82 methods, robust to covariate adjustment (over 40 variables investigated), and yielded no evidence of  
83 being the result of PD medications or disease duration<sup>11</sup>.

84 The analysis of interaction was structured as follows. (1) We screened for statistical interaction between  
85 2,627 SNP genotypes in the *SNCA* region, case-control status, and centered log-ratio (clr) transformed  
86 abundance of each taxon, and selected the SNP with the highest statistical significance as the candidate  
87 interacting SNP (Fig. 1a-c). (2) We then tested association of each taxon with case-control status after  
88 stratifying the subjects by the interacting SNP genotype. The effect of SNP on PD-taxa association was  
89 tested statistically (Table 1) and illustrated graphically (Fig. 2, Supplementary Fig. 1). (3) We tested  
90 association of interacting SNPs with PD (Table 2). This test was conducted because interaction can exist  
91 with or without a main effect of SNP on disease risk. SNPs with a main effect are detected in GWAS,  
92 modifiers without a main effect are missed in GWAS<sup>5,7</sup>. (4) We conducted *in silico* functional analysis of  
93 the interacting SNPs (Table 2, Fig. 1d,e). All analyses were performed in two datasets, followed-by meta-  
94 analysis.

## 95 ***Corynebacterium\_1***

96 (1) *Screening for interaction* (Fig. 1a). The candidate interacting SNP for *Corynebacterium\_1* was  
97 rs356229 (interaction  $P=2E-3$ ). rs356229 is located 3' of *SNCA* (Fig. 1). The two alleles are rs356229\_T  
98 (allele frequency=0.6) and rs356229\_C (frequency=0.4). rs356229 was imputed with imputation quality  
99 score of 0.96 in dataset 1 and 0.99 in dataset 2.

100 (2) *PD-taxa association varied by genotype* (Table 1a, Fig. 2). If we do not consider genotype,  
101 *Corynebacterium\_1* abundance is significantly elevated in PD (OR=1.6,  $P=3E-3$ ). However, when data  
102 are stratified by genotype, there is no association between *Corynebacterium\_1* and PD among individuals  
103 with rs356229\_TT genotype, who comprised 36% of the study (OR=1.0,  $P=0.92$ ). The association of  
104 *Corynebacterium\_1* with PD was dependent on the presence of the rs356229\_C allele. The abundance of

105 *Corynebacterium\_1* was nearly 2-fold higher in PD than controls in heterozygous rs356229\_CT (OR=1.9,  
106  $P=1E-3$ ), and 2.5-fold higher in the homozygous rs356229\_CC individuals (OR=2.5,  $P=0.03$ ).

107 (3) *Association of SNP with PD* (Table 2). rs356229 has been previously identified in PD GWAS meta-  
108 analysis, with the rs356229\_C allele associated with increased PD risk (OR=1.3,  $P=3E-42$  with  
109  $N=108,990$  samples, pdgene.org<sup>23</sup>). We also detected an association between rs356229\_C and PD in the  
110 present dataset (OR=1.3,  $P=0.04$  with  $N=802$  samples). That we estimated an effect size identical to  
111 GWAS, despite the enormous disparity in the sample size and power, speaks to the robustness of the data.  
112 Interestingly, the association of rs356229\_C with risk of PD varied by the increasing abundance of  
113 *Corynebacterium\_1* from no association in the 1<sup>st</sup> or 2<sup>nd</sup> quartile (OR=0.9,  $P=0.5$ ; OR=1.1,  $P=0.8$ ) to an  
114 emerging and then strong association in the 3<sup>rd</sup> and 4<sup>th</sup> quartiles (OR=1.4,  $P=0.1$  and OR=2.2,  $P=5E-3$ ).

115 The interactive effect of rs356229 on the association of *Corynebacterium\_1* and PD does not stem from  
116 its direct association with PD. This can be seen in Table 1a, where the test is between *Corynebacterium\_1*  
117 and PD; rs356229 is not in the test, it was only used to divide the samples by genotype, which showed  
118 varying association between the taxon and PD as a function of genotypes. Also of note is that rs356182,  
119 which is the highest SNP in the *SNCA* peak in PD GWAS (OR=1.34,  $P=2E-82$ ), yielded no evidence for  
120 interaction with the taxa tested here, underscoring the notion that the variants that show the strongest  
121 association with disease are not necessarily the best candidates for interaction.

122 (4) *Functional analysis in silico* (Fig. 1d,e, Table 2). rs356229 maps to a distal regulatory element at 3'  
123 of *SNCA*. rs356229 is an eQTL for *SNCA*. Data were obtained by eQTL GWAS conducted in whole  
124 blood (eQTLGen.org) and in esophagus mucosa (GTExportal.org). rs356229\_C allele is associated with  
125 increased expression of *SNCA* in blood (eQTL  $P=1E-13$ ) and in esophagus mucosa (eQTL  $P=9E-5$ ).  
126 According to GTEx, rs356229 is also an eQTL for *SNCA-AS1* (eQTL  $P=2E-7$ ) and *RP11-115D19.1*  
127 (eQTL  $P=3E-14$ ). *SNCA-AS1* and *RP11-115D19.1* overlap with *SNCA* and encode long non-coding RNA  
128 (lncRNA) that are antisense to *SNCA* (Fig. 1d) and have been implicated in regulation of *SNCA*  
129 expression<sup>29-31</sup>.

### 130 ***Porphyromonas***

131 (1) *Screening for interaction* (Fig. 1b). The candidate interacting SNP for *Porphyromonas* was  
132 rs10029694 (interaction  $P=6E-3$ ). rs10029694 maps to 3' of *SNCA* (Fig. 1). The two alleles are  
133 rs10029694\_G (frequency=0.9) and rs10029694\_C (frequency=0.1). rs10029694 was imputed with  
134 imputation quality score 0.99 in dataset 1 and 0.92 in dataset 2.

135 The interacting SNPs for *Porphyromonas* (rs10029694) and *Corynebacterium\_1* (rs356229) map very  
136 close to each other, only 480 base pairs apart, but they are not in linkage disequilibrium (LD):  $D' < 0.01$ ,  
137  $R^2 = 0$ .

138 (2) *PD-taxa association varies by genotype* (Table 1b, Fig. 2). *Porphyromonas* was elevated in PD  
139 irrespective of rs10029694\_G/C genotype (OR=2.0,  $P=7E-6$ ), and in every genotype, but the statistical  
140 interaction implied difference across genotypes. Shown in stratified analysis (Table 1b), the  
141 rs10029694\_GG genotype had a nearly two-fold higher abundance of *Porphyromonas* in PD vs. controls  
142 (OR=1.6,  $P=7E-3$ ), rs10029694\_GC had nearly five-fold difference (OR=4.5,  $P=2E-4$ ) and  
143 rs10029694\_CC had approximately 54-times higher abundance of *Porphyromonas* in PD than in controls  
144 (OR=53.9,  $P=8E-3$ ). Note however that there were only 11 individuals with rs10029694\_CC genotype.  
145 Although the statistical methods were carefully chosen to be robust to small sample size, and the  $P$  value  
146 is quite significant despite the sample size, the fact remains that the OR=54 was generated on only 11  
147 people. If we collapse the rare rs10029694\_CC genotype with rs10029694\_CG, we have 161 individuals  
148 (20% of subjects) with at least one copy of rs10029694\_C allele, and we get a more conservative estimate  
149 of OR=5.1 ( $P=2E-5$ ) for association of *Porphyromonas* with PD in people with one or two copies of  
150 rs10029694\_C.

151 (3) *Association of SNP with PD* (Table 2). rs10029694 has not been nominated by GWAS as a risk  
152 variant for PD, nor does it show evidence for association with PD in our datasets (OR=1.1,  $P=0.6$ ). This  
153 variant appears to impart an effect on the association of *Porphyromonas* with PD without having a main  
154 effect on PD. There are published examples of modifiers (*GRIN2A*, *SV2C*) that had no detectable main  
155 effect in GWAS but were found through interaction (with caffeine use and smoking) and were  
156 subsequently shown experimentally to play key roles in PD pathogenesis<sup>5,7</sup>.

157 As would be expected from the interaction, the frequency of the effect allele rs10029694\_C in PD vs.  
158 control rose with increasing abundance of *Porphyromonas*, yielding OR=0.6 ( $P=0.2$ ) for 1<sup>st</sup> quartile and  
159 increasing up to OR=2.2 ( $P=0.08$ ) for the 4<sup>th</sup> quartile.

160 (4) *Functional analysis in silico* (Fig. 1d,e and Table 2). rs10029694 maps to a distal regulatory element  
161 at 3' of *SNCA*, adjacent to another regulatory element where rs356229, the interacting SNP for  
162 *Corynebacterium\_1* resides. rs10029694 is an eQTL for two lncRNA that are antisense to *SNCA*: *RP11-*  
163 *115D19.1* (eQTL  $P=1E-5$ ) and *RP11-115D19.2* (eQTL  $P=7E-6$ ). *RP11-115D19.1* overlaps with 3' of  
164 *SNCA*; *RP11-115D19.2* is within *SNCA*. We did not find direct evidence for rs10029694 being an eQTL  
165 for *SNCA*. However, *RP11-115D19.1* and *RP11-115D19.2* are anti-sense to *SNCA* which based on current

166 knowledge on function of antisense lncRNA would be presumed to be regulatory for *SNCA*<sup>30,31</sup>, and  
167 *RP11-115D19.1* has been directly shown to regulate *SNCA* expression<sup>29</sup>.

## 168 *Prevotella*

169 (1) *Screening for interaction* (Fig. 1c). The candidate interacting SNP for *Prevotella* was rs6856813  
170 (interaction  $P=0.01$ ). rs6856813 is ~100kb upstream at 5' of *SNCA*. The two alleles are rs6856813\_T  
171 (frequency=0.6) and rs6856813\_C (frequency=0.4). rs6856813 was imputed with imputation quality  
172 score 0.98 in dataset 1 and 0.84 in dataset 2. rs6856813 is 300Kb away from and not in LD with the  
173 interacting SNPs of *Corynebacterium\_1* (rs356229,  $D'=0.2$ ,  $R^2=0.04$ ) or *Porphyromonas* (rs10029694,  
174  $D'=0.36$ ,  $R^2=0.01$ ).

175 (2) *PD-taxa association varies by genotype* (Table 1c, Fig. 2). *Prevotella* was elevated two-fold in PD vs.  
176 controls (OR=2.2,  $P=4E-7$ ). Genotype-specific results suggest rs6856813\_TT had the greatest  
177 differential abundance in PD vs. control (OR=3.5,  $P=2E-7$ ), followed by rs6856813\_TC (OR=1.8,  
178  $P=0.01$ ), and no difference in rs6856813\_CC genotype (OR=1.0,  $P=0.95$ ).

179 (3) *Association of SNP with PD* (Table 2). rs6856813\_C/T had no main effect for association with PD in  
180 this study (OR=0.9,  $P=0.4$ ) nor in PD GWAS<sup>23</sup>. There is a statistically non-significant trend of increasing  
181 frequency of rs6856813\_T allele with increasing abundance of *Prevotella* in PD, yielding OR=0.8 in 1<sup>st</sup>  
182 quartile and increasing to OR=1.5 in 4<sup>th</sup> quartile, consistent with the presence of interaction.

183 (4) *Functional analysis in silico* (Fig. 1d,e, Table 2). Although rs6856813 is ~100kb upstream of *SNCA*  
184 and does not map to a known regulatory sequence, it is a strong eQTL for *SNCA*: the rs6856813\_T allele,  
185 which is the effect allele for interaction with *Prevotella*, is associated with increased *SNCA* expression in  
186 blood (eQTL  $P=3E-49$ ) and in arteries (eQTL  $P=2E-5$ ).

## 187 **Discussion**

188 Numerous studies have been performed on the association of genetic variants with PD and separately of  
189 gut microbiome and PD, but this is the first, to our knowledge, that has attempted to study the interaction  
190 between the two. Here we have used a candidate taxa, candidate gene strategy: we used prior knowledge  
191 of the association of PD with elevated abundances of certain opportunistic pathogens in the gut<sup>11</sup> and  
192 searched for genetic modifiers of these associations in the *SNCA* gene region<sup>23</sup>. Through statistical  
193 interaction tests we identified specific variants in the *SNCA* region as candidate interacting variants and

194 through genotype-stratified analyses we showed that the increases in relative abundance of opportunistic  
195 pathogens in PD gut is modulated by host genotype.

196 Statistical interaction tests provide a means to investigate if association of one factor with the trait is  
197 influenced by a second factor. Interaction studies require much larger sample sizes and power than  
198 association studies; the P values for interaction seldom achieve significance, and when they do, they are  
199 far less significant than the P values for a similarly sized one-factor association study. Here, we tested if  
200 association of three opportunistic pathogens with PD (organisms with higher relative abundance in PD  
201 cases than similarly aged controls) is dependent on genetic variations in or around *SNCA*. Sometimes the  
202 interacting variant discovered by this approach is also directly associated with trait, but not always. In the  
203 present study, the SNP that affects the association of *Corynebacterium\_1* with PD is also directly  
204 associated with PD (it is one of the SNPs in the *SNCA* peak in PD GWAS); in contrast, the interacting  
205 SNPs for *Porphyromonas* and *Prevotella* have no main effect that can be detected as association with PD.  
206 Factors that do not have a main effect on the trait are missed in association tests (e.g., GWAS). Thus,  
207 interaction testing is complementary to association testing in that it can identify novel markers that are  
208 otherwise missed. Two prior examples of PD-relevant genes that were missed by GWAS are synaptic  
209 vesicle 2C (*SV2C*) gene which emerged in interaction with smoking<sup>7</sup> and led to deciphering its role in  
210 dopamine release and its disruption in PD<sup>32</sup>, and the gene encoding Glutamate Ionotropic Receptor  
211 NMDA Type Subunit 2A (*GRIN2A*) which was detected via interaction with caffeine intake<sup>5</sup>. Neither  
212 *SV2C* nor *GRIN2A* has a main effect on PD and were both missed in GWAS. The present study is  
213 conceptually similar to the *SV2C* and *GRIN2A* studies, but on a smaller scope because of the limited  
214 sample size. Interaction studies that revealed *SV2C* and *GRIN2A* were conducted on a genome-wide level  
215 with a sample size of approximately 1500 PD and 1500 controls for whom both genotype and  
216 smoking/caffeine data were available. The largest PD datasets that have both genotype and microbiome  
217 data are the two datasets used here, one has 199 PD and 117 controls and the other 312 PD and 174  
218 controls. It will be important to collect larger datasets which will allow the exploration of genotype-  
219 microbiome interactions at the genome-wide and microbiome-wide level.

220 Our rationale for choosing *SNCA* and opportunistic pathogen as our candidate gene and candidate taxa  
221 stemmed from the collective literature. *SNCA* is a key player in PD. Alpha-synuclein aggregates are a  
222 pathologic hallmark of PD. Mutations in *SNCA* cause autosomal dominant PD and variants that affect  
223 *SNCA* gene expression are the most significant genetic risk factors for idiopathic PD<sup>23,33</sup>. While the  
224 functions of alpha-synuclein is yet to be fully understood, it has been shown to play a key role in  
225 activating the immune system, acting as antigen presented by PD-associated major histocompatibility  
226 molecules and recognized by T cells which infiltrate the brain<sup>34-36</sup>. *SNCA* expression has also been



227 shown to be critical for inducing immune response against infections unrelated to PD<sup>27,28</sup>. Alpha-  
228 synuclein aggregates, which have historically been considered as a marker of PD pathology in the brain,  
229 can actually form in the enteric neurons<sup>19</sup> and in animal models have been shown to propagate from the  
230 gut to the brain<sup>22</sup> possibly via the vagus nerve<sup>37,38</sup>. The trigger that induces alpha-synuclein pathology in  
231 the gut is unknown. Braak hypothesized the trigger is a pathogen<sup>17,18</sup>. Our choice of opportunistic  
232 pathogens as the candidate taxa for interaction testing was driven by our recent finding of an  
233 overabundance of opportunistic pathogens in PD gut and Braak's hypothesis. Moreover, a study  
234 conducted in mice has corroborated that intestinal infection triggers dopaminergic cell loss and motor  
235 impairment in a *Pink1* knockout model of PD<sup>39</sup>. Whether the opportunistic pathogens found in human PD  
236 microbiome are the triggers of PD is being investigated. In the meantime, we thought that if these  
237 opportunistic pathogens are involved in PD pathogenesis, there is likely a connection to *SNCA* genotype  
238 worth testing.

239 Interestingly, three different *SNCA*-linked genetic variants emerged as modifiers for the association of the  
240 three opportunistic pathogens with PD. They are independent of each other with no LD among them. All  
241 three interacting variants are eQTLs for *SNCA* and lncRNAs that affect expression of *SNCA*. This  
242 suggests a link between *SNCA* expression and presence of opportunistic pathogens, and that regulation of  
243 this link may involve different regulatory elements depending on the pathogen. We do not know if this is  
244 because of tissue specificity of gene expression. It is not known which cells in the gut are responsible for  
245 expression and corruption of alpha-synuclein into pathologic species. If the opportunistic pathogens  
246 induce *SNCA* expression, they may do so by signaling different cell types, hence the involvement of  
247 different regulatory elements. *Prevotella* and *Porphyromonas* are commensal to gastrointestinal and  
248 urinary track, *Corynebacterium* is common in skin microbiome. All three can be found at low abundance  
249 in the gut. All three have been implicated in causing infections in nearly every type of tissue (reviewed by  
250 Wallen et al.<sup>11</sup>).

251 These data provide new leads that with follow-up will yield a better understanding of disease  
252 pathogenesis. These data alone cannot resolve cause and effect. We cannot tell if the *SNCA* genotype  
253 leads to altered colonization of the gut, which in turn leads to PD, or is it the other way around, *SNCA*  
254 genotype causes PD (unlikely in the absence of a main effect on PD), which leads to gut dysfunction and  
255 accumulation of pathogens. Or, maybe the pathogen induces alpha-synuclein expression which elicits  
256 immune response to infection as seen in other infections unrelated to PD, but in individuals with certain  
257 regulatory genotypes at *SNCA*, alpha-synuclein expression goes into overdrive and PD is a down-stream  
258 consequence. Further studies in humans conducted over time and in experimental models will be needed  
259 to tease out the underlying biology of these interactions.

260 This study serves as proof of principal that genetic susceptibility to disease and the dysbiosis in the gut  
261 microbiome are not operating independently. Rather, it suggests that alterations in gut microbiome should  
262 be integrated in the gene-environment interaction paradigm, which has long been suspected to be the  
263 cause of idiopathic disease but is yet to produce a causative combination. To advance these ideas further,  
264 the biggest challenge is to secure well-coordinated studies with large sample sizes. Unlike genetic studies  
265 which can be pooled thanks to the stability of DNA, pooling of microbiome studies should be avoided  
266 due to effects of collection and storage parameters on outcomes. Standardization of methods can alleviate  
267 some of the cross-study variations. It is also more difficult to collect stool samples than, for example,  
268 smoking data or saliva. People are averse to donating stool samples; 30% of our research participants who  
269 donated blood refused to donate stool. Researchers are cognizant of the need to join resources, create  
270 standardized protocols, and coordinate data collection across laboratories. Within a few years, we will be  
271 able to amass the sample sizes needed to address interaction of genes, environment, and microbiome on a  
272 comprehensive scale.

## 273 **Methods**

### 274 **Subjects**

275 The study was approved by the institutional review boards at all participating institutions, namely New  
276 York State Department of Health, University of Alabama at Birmingham, VA Puget Sound Health Care  
277 System, Emory University, and Albany Medical Center. All subjects provided written informed consent  
278 for their participation. This study included two datasets each composed of persons with PD (case) and  
279 neurologically healthy individuals (control). Subject enrollment and data collection for both datasets was  
280 conducted by the NeuroGenetics Research Consortium (NGRC) team using uniform protocols. The two  
281 datasets used here were the same datasets used by Wallen et al for characterizing the microbiome<sup>11</sup>;  
282 except here we have generated and added genetic data, and subjects without genotype were excluded  
283 (Supplementary Table 1). Methods of subject selection and data collection have been described in detail  
284 before<sup>11</sup>. Briefly, PD was diagnosed by NGRC-affiliated movement disorder specialists<sup>40</sup>. Controls were  
285 self-reported free of neurological disease. Metadata were collected on over 40 variables including age,  
286 sex, race, geography, diet, medication, health, gastrointestinal issues, weight fluctuation, and body mass  
287 index. We enrolled 212 persons with PD and 136 controls in 2014 (dataset 1)<sup>41</sup>, and 323 PD and 184  
288 controls during 2015–2017 (dataset 2)<sup>11</sup>. Subsequently, we excluded 11 PD and 4 control samples for  
289 failing 16S sequencing, 2 PD for unreliable metadata, and 15 controls for lacking genotypes from dataset  
290 1; and 11 PD and 10 controls were excluded from dataset 2 for lacking genotype data. The sample size

291 used in current analyses was 199 PD and 117 controls in dataset 1, and 312 PD and 174 controls in  
292 dataset 2 (Supplementary Table 1).

### 293 **Microbiome data**

294 Methods for collection, processing and analysis of microbiome data have been reported in detail<sup>11</sup>, and  
295 raw sequences are publicly available at NCBI SRA BioProject ID PRJNA601994. Each subject provided  
296 a single stool sample at a single time point, and each sample was measured once. Briefly, for both  
297 datasets uniformly, DNA/RNA-free sterile cotton swabs were used to collect stool, DNA was extracted  
298 using MoBio extraction kits, and 16S rRNA gene hypervariable region 4 was sequenced using the same  
299 primers, but in two laboratories, resulting in 10x greater sequencing depth in dataset 2 than dataset 1.  
300 Sequences were demultiplexed using QIIME2 (core distribution 2018.6)<sup>42</sup> for dataset 1 and BCL2FASTQ  
301 (Illumina, San Deigo, CA) for dataset 2. Bioinformatics processing of sequences was performed  
302 separately for each dataset, but using an identical pipeline (see Wallen et al<sup>11</sup> for step-by-step protocol).  
303 Unique amplicon sequence variants (ASVs) were identified using DADA2 v 1.8<sup>43</sup> and given taxonomic  
304 assignment using DADA2 and SILVA (v 132) reference database. Analyses were performed at  
305 genus/subgenus/clade level (here, referred to as taxa). Taxa that were associated with PD were then  
306 investigated at species level. This was important because not all species of *Corynebacterium\_1*,  
307 *Porphyromonas*, and *Prevotella* are opportunistic pathogens. Species that made-up each taxon were  
308 identified by SILVA when an ASV matched a species at 100% homology. To augment SILVA, we  
309 blasted ASVs that made up *Corynebacterium\_1*, *Porphyromonas*, and *Prevotella* against the NCBI 16S  
310 rRNA database for matches that were >99–100% identical with high statistical confidence.

### 311 **Genetic data**

312 *Defining SNCA region.* Since expression of *SNCA* has been implicated in PD and the most significant  
313 genetic markers of PD map outside *SNCA* and are eQTL for *SNCA*, we set out to explore the entire region  
314 that includes known *cis*-eQTLs for *SNCA*. We used GTEx (V8 release) database and searched for eQTLs  
315 for *SNCA* (<https://gtexportal.org/home/gene/SNCA>). The search returned 1,749 entries which included  
316 601 unique eQTLs. They span from ch4:90.6Mb at 5' upstream *SNCA* to ch4:88.9Mb at 3' downstream  
317 *SNCA* (GRCh38/hg38). We had genotypes for 2,627 SNPs in this region (excluding SNPs with MAF<0.1  
318 and imputation quality score <0.8), and among them, we had captured 413 of the 601 eQTLs for *SNCA*.  
319 Interaction test was conducted for all 2,627 SNPs and the SNP with the highest interaction *P* value was  
320 chosen for genotype-stratified analysis.

321 Genotype data for the *SNCA* region were extracted from GWAS data. Since only some of the GWAS data  
322 have been published and most were generated recently and unpublished, we will provide the methods in  
323 detail. Dataset 1 is composed of a subset of the NGRC subjects who were genotyped in 2009 using  
324 Illumina HumanOmni1-Quad array (GWAS published in 2010)<sup>36</sup> and were subsequently enrolled for  
325 microbiome study, and additional NGRC samples that were collected for microbiome studies in 2014 who  
326 were genotyped in 2018 using Illumina Infinium Multi-Ethnic array (unpublished data). Dataset 2 was  
327 enrolled into NGRC in 2015-2017 and genotyped in 2020 using Infinium Global Diversity Array  
328 (unpublished data). Genotyping and quality control (QC) of SNP genotypes are described below. Unless  
329 otherwise specified, QC was performed using PLINK 1.9 (v1.90b6.16)<sup>44</sup>.

330 *HumanOmni1-Quad\_v1-0\_B BeadChip*. Approximately 70% of subjects in dataset 1 (N=244) were  
331 genotyped in 2009 using the HumanOmni1-Quad\_v1-0\_B BeadChip for a GWAS of PD<sup>36</sup>, resulting in  
332 genotypes for 1,012,895 SNPs. Subjects were also genotyped using the Illumina ImmunoChip resulting in  
333 genotypes for 202,798 SNPs. QC of genotype data had been previously performed using PLINK v1.07,<sup>36</sup>  
334 therefore, this process was redone for current study using an updated version of PLINK v1.9. The mean  
335 non-Y chromosome call rate for samples in both arrays was 99.9%. Calculation of identity-by-descent in  
336 PLINK using HumanOmni genotypes revealed no cryptic relatedness between samples ( $PI\_HAT > 0.15$ ).  
337 A subset of SNP mappings were in NCBI36/hg18 build, and were converted to GRCh37/hg19 using the  
338 liftOver executable and hg18ToHg19.over.chain.gz chain file from UCSC genome browser (downloaded  
339 from <https://hgdownload.soe.ucsc.edu/downloads.html>). SNP filtering for both HumanOmni and  
340 ImmunoChip genotypes included removal of SNPs with call rate < 99%, Hardy-Weinberg equilibrium  
341 (HWE)  $P$  value <  $1E-6$ , MAF < 0.01, and MAF difference between sexes > 0.15. HumanOmni and  
342 ImmunoChip data were then merged, and SNPs with significant differences in PD patient and control  
343 missing rates ( $P < 1E-5$ ) and duplicate SNPs were removed. To remove duplicate SNPs, we first checked  
344 the genotype concordance between duplicated SNPs. If duplicate SNPs were concordant, we took the  
345 SNP with the lowest missing rate, or the first listed SNP if missing rates were the same. If duplicate SNPs  
346 were discordant, we removed both SNPs as we do not know which SNP is correct. After QC, the  
347 remaining number of genotyped SNPs was 910,083 with a mean call rate of 99.8%.

348 *Infinium Multi-Ethnic EUR/EAS/SAS-8 Kit*. Approximately 30% of subjects in dataset 1 (N=89) were  
349 enrolled after the 2010 PD GWAS. These samples were genotyped in 2018 using the Infinium Multi-  
350 Ethnic EUR/EAS/SAS-8 array. Raw genotyping intensity files were uploaded to GenomeStudio v 2.0.4  
351 where genotype cluster definitions and calls were determined for each SNP using intensity data from all  
352 samples. The GenCall (genotype quality score) threshold for calling SNP genotypes was set at 0.15, and  
353 SNPs that resulted in a genotype cluster separation < 0.2 were zeroed out for their genotype. Genotypes

354 for 1,649,668 SNPs were then exported from GenomeStudio using the PLINK plugin v 2.1.4, and  
355 converted to PLINK binary files for further QC. The mean non-Y chromosome call rate for samples was  
356 99.8%. Calculation of identity-by-descent revealed no cryptic relatedness among samples ( $PI\_HAT <$   
357  $0.15$ ). A subset of SNP mappings were in GRCh38/hg38 build, and were converted to GRCh37/hg19  
358 using the liftOver executable and hg38ToHg19.over.chain.gz chain file. The same SNP filtering criteria  
359 were implemented here as described above for the first group in dataset 1: call rate  $< 99\%$ , HWE  $P$  value  
360  $< 1E-6$ , MAF  $< 0.01$ , MAF difference between sexes  $> 0.15$ , significant differences in PD patient and  
361 control missing rates ( $P < 1E-5$ ), and removal of duplicate SNPs. After QC, the remaining number of  
362 genotyped SNPs was 749,362 with a mean call rate of 100%.

363 *Infinium Global Diversity Array-8 v1.0 Kit*. All subjects in dataset 2 ( $N=486$ ) were genotyped at once in  
364 2020 using the Infinium Global Diversity Array. Genotype clusters were defined using GenomeStudio v  
365 2011.1 and 99% of the genotyped samples. Genotypes were not called for SNPs with GenCall score  
366  $< 0.15$ , and failure criteria for autosomal and X chromosome SNPs included the following: call rate  $<$   
367  $85\%$ , MAF  $\leq 1\%$  and call rate  $< 95\%$ , heterozygote rate  $\geq 80\%$ , cluster separation  $< 0.2$ , any positive  
368 control replicate errors, absolute difference in call rate between genders  $> 10\%$  (autosomal only), absolute  
369 difference in heterozygote rate between genders  $> 30\%$  (autosomal only), and male heterozygote rate  
370 greater than 1% (X only). All Y chromosome, XY pseudo-autosomal region (PAR), and mitochondrial  
371 SNPs were manually reviewed. Genotypes for 1,827,062 SNPs were released in the form of PLINK  
372 binary files. The mean non-Y chromosome call rate for samples was 99.2%. Calculation of identity-by-  
373 descent showed two subjects were genetically related as a parent and offspring ( $PI\_HAT = 0.5$ ), which we  
374 were already aware of. The same SNP filtering criteria was implemented here as it was for dataset 1: call  
375 rate  $< 99\%$ , HWE  $P$  value  $< 1E-6$ , MAF  $< 0.01$ , MAF difference between sexes  $> 0.15$ , significant  
376 differences in PD patient and control missing rates ( $P < 1E-5$ ), and removal of duplicate SNPs. After QC,  
377 the remaining number of SNPs for dataset 2 was 783,263 with a mean call rate of 99.9%.

378 *Principal component analysis (PCA)*. We performed PCA for each genotyping array using 1000  
379 Genomes Phase 3 reference genotypes. Study genotypes were first merged with 1000 Genomes Phase 3  
380 genotypes (previously filtered for non-triallelic SNPs and SNPs with MAF  $> 5\%$ ) using  
381 GenotypeHarmonizer v 1.4.23<sup>45</sup> and PLINK. Merged genotypes were then LD-pruned as previously  
382 described<sup>36</sup>, resulting in a mean LD-pruned subset of  $\sim 148,000$  SNPs. Principal components were  
383 calculated using pruned SNPs and the top two PCs were plotted using ggplot2 (Supplementary Figure 1).

384 *Imputation*. To increase SNP density, we imputed genotypes using Minimac4<sup>46</sup> on Trans-Omics for  
385 Precision Medicine (TOPMed) Imputation Server (<https://imputation.biodatacatalyst.nhlbi.nih.gov>)<sup>47</sup>. To

386 be compatible with TOPMed, we converted SNP coordinates to GRCh38/hg38 using the liftOver  
387 executable and hg19ToHg38.over.chain.gz chain file. SNP mappings were then checked and corrected for  
388 use with TOPMed reference panels using the utility scripts HRC-1000G-check-bim.pl (v4.3.0) and  
389 CreateTOPMed.pl (downloaded from <https://www.well.ox.ac.uk/~wrayner/tools/>), and a TOPMed  
390 reference file ALL.TOPMed\_freeze5\_hg38\_dbSNP.vcf.gz (downloaded from  
391 <https://bravo.sph.umich.edu/freeze5/hg38/download>). Running of these utility scripts resulted in a series  
392 of PLINK commands to correct genotypes files for concordance with TOPMed by excluding SNPs that  
393 did not have a match in TOPMed, mitochondrial SNPs, palindromic SNPs with frequency > 0.4, SNPs  
394 with non-matching alleles to TOPMed, indels, and duplicates. Once running of PLINK commands was  
395 complete, genotype files were converted to variant call format (VCF) and submitted to the TOPMed  
396 Imputation Server using the following parameters: reference panel TOPMed version r2 2020, array build  
397 GRCh38/hg38,  $r^2$  filter threshold 0.3 (although we excluded from downstream analyses SNPs with  $r^2$   
398 <0.8), Eagle v2.4 for phasing, skip QC frequency check, and run in QC & imputation mode. VCF files  
399 with genotypes and imputed dosage data were then outputted by the imputation server and used in  
400 statistical analyses. Directly genotyped and imputed genotypes from HumanOmni1-Quad\_v1-0\_B  
401 BeadChip and Infinium Multi-Ethnic EUR/EAS/SAS-8 Kit arrays were merged to create dataset 1. To  
402 merge genotypes, one duplicate subject was first removed from the Infinium Multi-Ethnic array VCF  
403 files. Then, per chromosome VCF files were merged by first indexing the files using tabix, then merging  
404 the files using bcftools' merge function (tabix and bcftools v 1.10.2). The genome-wide data included  
405 20,263,129 SNPs (1,282,026 genotyped and 18,981,103 imputed) for dataset 1 and 21,389,007 SNPs  
406 (719,329 genotyped and 20,669,678 imputed) for dataset 2.

407 For the present study, the *SNCA* region was defined as ch4:88.9Mb-90.6Mb (as described above). SNPs  
408 within *SNCA* region with MAF<0.1 were excluded as there would be too few homozygotes for stratified  
409 analysis. Imputed SNPs with imputation quality score  $r^2$ <0.8 were also excluded. Analysis included  
410 2,627 SNPs that were directly genotyped or imputed in both datasets.

#### 411 **Statistical analysis**

412 For all analyses, raw taxa abundances were transformed using the centered log-ratio (clr) transformation  
413 before including in tests. The clr transformation was performed using the following formula in R:

$$414 \quad [\log(X_{taxa}) - \text{mean}(\log(X_1, X_2 \dots X_n))]$$

415 where  $X_{taxa}$  is the raw abundance of either *Corynebacterium\_1*, *Porphyromonas*, or *Prevotella* in a  
416 single sample with a pseudocount of 1 added, and  $X_1, X_2 \dots X_n$  are the raw abundances of every taxon  
417 detected in the same sample with a pseudocount of 1 added.

418 Throughout, tests were conducted in two datasets separately, and results were meta-analyzed using fixed-  
419 and random-effect models, and tested for heterogeneity. If heterogeneity was detected across two datasets  
420 (Cochran's  $Q P < 0.1$ ), random-effect meta-analysis results were reported. If no heterogeneity was  
421 detected (Cochran's  $Q P \geq 0.1$ ), fixed-effect results were reported.  $P$  values were all two-tailed.

422 (1) *Screening for Interaction.* We tested interaction to identify candidate SNPs that may modify the  
423 association of *Corynebacterium\_1*, *Porphyromonas*, or *Prevotella* with PD. For each dataset separately,  
424 linear regression was performed using PLINK 2 (v2.3 alpha) --glm function to test the interaction  
425 between case/control status and SNP on the abundance of each taxon.

426 
$$[\text{Taxon} \sim (\text{SNP} \times \text{case/control}) + \text{SNP} + \text{case/control} + \text{sex} + \text{age}]$$

427 where taxon is the clr transformed abundance of *Corynebacterium\_1*, *Porphyromonas*, or *Prevotella*, and  
428 SNP is genotype defined as dosages of the minor allele ranging from 0 to 2 in additive model. Interaction  
429 test was adjusted for sex, age, and main effects of case/control status and SNP. Interaction  $\beta$  and standard  
430 errors generated for each taxon were then used as input for meta-analysis in METASOFT v2.0.1<sup>48</sup>.  
431 Summary statistics are in Supplementary Tables 2-4. For each taxon, the SNP that reached the highest  
432 statistical significance in meta-analysis was tagged as candidate interacting SNP.

433 *Linkage disequilibrium:* To visualize the results across the *SNCA* region, results from meta-analyses were  
434 uploaded to LocusZoom<sup>49</sup>. LD between SNPs was calculated in LocusZoom based on the "EUR" LD  
435 population. The resulting plots show the location of the SNPs tested in the region and their LD with  
436 candidate interacting SNP (Fig. 1a-c).

437 To determine if the three candidate interacting SNPs were correlated, possibly tagging the same variant,  
438 or independent, pairwise LD estimates were calculated using the LDpair tool with 1000 Genome phase 3  
439 European data from LDlink v4.1.<sup>50</sup>

440 (2) *Association of taxa with PD as a function of genotype.* Subjects were grouped by their genotype at the  
441 interacting SNP. We used the best guessed genotype for the imputed SNPs and directly genotyped SNPs.  
442 Association of each taxon with PD (case/control status) was tested within each genotype, while adjusting  
443 for age and sex, using linear regression via the R function glm from the stats v 3.5.0 package. Odds ratios

444 (OR) and corresponding  $P$  values were calculated using linear regression. Each dataset was analyzed  
445 separately. Meta-analysis was performed using the metagen function of the meta R package v4.9.7,  
446 specifying the summary measure to be “OR”. Results are shown in Table 1. Boxplots were created using  
447 ggplot2 v 3.1.0 (Fig. 2). Of the two variants of each SNP, the one that was associated with enhanced  
448 differential abundance in PD vs. controls was tagged as the effect allele.

449 (3) *Association of interacting SNP with PD*. To test whether the interacting SNP had a main effect on PD  
450 risk, we used Firth’s penalized logistic regression (logistf R package v 1.23) testing SNP genotype  
451 (dosages of the effect allele ranging from 0 to 2) in an additive model against case-control status adjusting  
452 for age and sex. OR, SE and  $P$  values were calculated. Results were meta-analyzed using a fixed-effects  
453 model as implemented in the metagen function, of the meta R package v4.9.7, specifying the summary  
454 measure to be “OR”.

#### 455 **Functional analysis *in silico*.**

456 While we had defined the *SNCA* region such that it encompassed known eQTLs, only 413 of 2,676 SNPs  
457 tested were eQTL. Thus, if left to chance, the odds that a candidate SNP would be an eQTL was ~15%.  
458 We used UCSC Genome Browser (hg38 build) to map the candidate SNPs and visually inspect if they  
459 were in a regulatory sequence. To determine, for each SNP, if they were found in genome-wide studies to  
460 be significantly associated with gene expression, we used two eQTL databases, GTEx  
461 (<https://gtexportal.org>) and eQTLGen (<https://www.eqtlgen.org>).

#### 462 **Data Availability**

463 Individual-level raw 16S sequences and basic metadata are publicly available at NCBI Sequence Read  
464 Archive (SRA) BioProject ID PRJNA601994. Genetic data and summary statistics of interaction of 2,627  
465 SNPs in *SNCA* region with PD on clr transformed abundances of taxa are provided in Supplementary  
466 Table 2 for *Corynebacterium\_1*, Supplementary Table 3 for *Porphyromonas*, and Supplementary Table 4  
467 for *Prevotella*.

#### 468 **Code availability**

469 No custom codes were used. All software and packages, their versions, relevant specification and  
470 parameters are stated in the Methods section.



## 471 **Acknowledgements**

472 This work was supported by the US Army Medical Research Materiel Command endorsed by the US  
473 Army through the Parkinson's Research Program Investigator-Initiated Research Award under Award  
474 number W81XWH1810508 (to H.P.), National Institute of Neurological Disorders and Stroke grant R01  
475 NS036960 (to H.P.), NIH Udall grants P50 NS062684 (to C.P.Z.) and P50 NS108675 (to D.G.S.), NIH  
476 Training Grant T32 NS095775 (to Z.D.W.) and NIH T32 GM008361 Medical Scientist Training Program  
477 (to W.J.S). Opinions, interpretations, conclusions, and recommendations are those of the authors and are  
478 not necessarily endorsed by the US Army or the NIH.

## 479 **Authorship contributions**

480 Conception (HP), design (HP, ZDW, SAF, EM, CPZ, DGS), data acquisition (HP, SAF, EM, CPZ, DGS),  
481 data analysis (HP, ZDW, WJS), interpretation (HP, ZDW), drafting the manuscript (ZDW, HP) and  
482 revising it critically for important intellectual content (all authors).

## 483 **Competing interest**

484 None.

## 485 **References**

- 486 1 Collaborators, G. B. D. P. s. D. Global, regional, and national burden of Parkinson's disease,  
487 1990-2016: a systematic analysis for the Global Burden of Disease Study 2016. *Lancet Neurol*  
488 **17**, 939-953, doi:10.1016/S1474-4422(18)30295-3 (2018).
- 489 2 Chang, D. *et al.* A meta-analysis of genome-wide association studies identifies 17 new  
490 Parkinson's disease risk loci. *Nat Genet*, doi:10.1038/ng.3955 (2017).
- 491 3 Nalls, M. A. *et al.* Identification of novel risk loci, causal insights, and heritable risk for  
492 Parkinson's disease: a meta-analysis of genome-wide association studies. *Lancet Neurol* **18**, 1091-  
493 1102, doi:10.1016/S1474-4422(19)30320-5 (2019).
- 494 4 Tanner, C. M. Advances in environmental epidemiology. *Mov Disord* **25 Suppl 1**, S58-62 (2010).

- 495 5 Hamza, T. H. *et al.* Genome-Wide Gene-Environment Study Identifies Glutamate Receptor Gene  
496 GRIN2A as a Parkinson's Disease Modifier Gene via Interaction with Coffee. *PLoS Genet* **7**,  
497 e1002237 (2011).
- 498 6 Cannon, J. R. & Greenamyre, J. T. Gene-environment interactions in Parkinson's disease: specific  
499 evidence in humans and mammalian models. *Neurobiol Dis* **57**, 38-46,  
500 doi:10.1016/j.nbd.2012.06.025 (2013).
- 501 7 Hill-Burns, E. M. *et al.* A genetic basis for the variable effect of smoking/nicotine on Parkinson's  
502 disease. *Pharmacogenomics J* **13**, 530-537, doi:10.1038/tpj.2012.38 (2013).
- 503 8 Biernacka, J. M. *et al.* Genome-wide gene-environment interaction analysis of pesticide exposure  
504 and risk of Parkinson's disease. *Parkinsonism Relat Disord* **32**, 25-30,  
505 doi:10.1016/j.parkreldis.2016.08.002 (2016).
- 506 9 Travagli, R. A., Browning, K. N. & Camilleri, M. Parkinson disease and the gut: new insights  
507 into pathogenesis and clinical relevance. *Nat Rev Gastroenterol Hepatol* **17**, 673-685,  
508 doi:10.1038/s41575-020-0339-z (2020).
- 509 10 Horsager, J. *et al.* Brain-first versus body-first Parkinson's disease: a multimodal imaging case-  
510 control study. *Brain* **143**, 3077-3088, doi:10.1093/brain/awaa238 (2020).
- 511 11 Wallen, Z. D. *et al.* Characterizing dysbiosis of gut microbiome in PD: evidence for  
512 overabundance of opportunistic pathogens. *NPJ Parkinsons Dis* **6**, 11, doi:10.1038/s41531-020-  
513 0112-6 (2020).
- 514 12 Schmidt, T. S. B., Raes, J. & Bork, P. The Human Gut Microbiome: From Association to  
515 Modulation. *Cell* **172**, 1198-1215, doi:10.1016/j.cell.2018.02.044 (2018).
- 516 13 Morais, L. H., Schreiber, H. L. t. & Mazmanian, S. K. The gut microbiota-brain axis in behaviour  
517 and brain disorders. *Nat Rev Microbiol*, doi:10.1038/s41579-020-00460-0 (2020).
- 518 14 Fan, Y. & Pedersen, O. Gut microbiota in human metabolic health and disease. *Nat Rev*  
519 *Microbiol* **19**, 55-71, doi:10.1038/s41579-020-0433-9 (2021).
- 520 15 Gerhardt, S. & Mohajeri, M. H. Changes of Colonic Bacterial Composition in Parkinson's  
521 Disease and Other Neurodegenerative Diseases. *Nutrients* **10**, doi:10.3390/nu10060708 (2018).

- 522 16 Boertien, J. M., Pereira, P. A. B., Aho, V. T. E. & Scheperjans, F. Increasing Comparability and  
523 Utility of Gut Microbiome Studies in Parkinson's Disease: A Systematic Review. *J Parkinsons*  
524 *Dis* **9**, S297-S312, doi:10.3233/JPD-191711 (2019).
- 525 17 Braak, H. *et al.* Staging of brain pathology related to sporadic Parkinson's disease. *Neurobiol*  
526 *Aging* **24**, 197-211 (2003).
- 527 18 Braak, H., Rub, U., Gai, W. P. & Del Tredici, K. Idiopathic Parkinson's disease: possible routes  
528 by which vulnerable neuronal types may be subject to neuroinvasion by an unknown pathogen. *J*  
529 *Neural Transm (Vienna)* **110**, 517-536, doi:10.1007/s00702-002-0808-2 (2003).
- 530 19 Shannon, K. M. *et al.* Alpha-synuclein in colonic submucosa in early untreated Parkinson's  
531 disease. *Mov Disord* **27**, 709-715, doi:10.1002/mds.23838 (2012).
- 532 20 Breen, D. P., Halliday, G. M. & Lang, A. E. Gut-brain axis and the spread of alpha-synuclein  
533 pathology: Vagal highway or dead end? *Mov Disord* **34**, 307-316, doi:10.1002/mds.27556 (2019).
- 534 21 Knudsen, K. *et al.* In-vivo staging of pathology in REM sleep behaviour disorder: a  
535 multimodality imaging case-control study. *Lancet Neurol* **17**, 618-628, doi:10.1016/S1474-  
536 4422(18)30162-5 (2018).
- 537 22 Kim, S. *et al.* Transneuronal Propagation of Pathologic alpha-Synuclein from the Gut to the Brain  
538 Models Parkinson's Disease. *Neuron* **103**, 627-641 e627, doi:10.1016/j.neuron.2019.05.035  
539 (2019).
- 540 23 Nalls, M. A. *et al.* Large-scale meta-analysis of genome-wide association data identifies six new  
541 risk loci for Parkinson's disease. *Nat Genet* **46**, 989-993, doi:10.1038/ng.3043 (2014).
- 542 24 Mata, I. F. *et al.* SNCA variant associated with Parkinson disease and plasma alpha-synuclein  
543 level. *Arch Neurol* **67**, 1350-1356 (2010).
- 544 25 Emelyanov, A. *et al.* SNCA variants and alpha-synuclein level in CD45+ blood cells in  
545 Parkinson's disease. *J Neurol Sci* **395**, 135-140, doi:10.1016/j.jns.2018.10.002 (2018).
- 546 26 Consortium, G. Human genomics. The Genotype-Tissue Expression (GTEx) pilot analysis:  
547 multitissue gene regulation in humans. *Science* **348**, 648-660, doi:10.1126/science.1262110  
548 (2015).

- 549 27 Tomlinson, J. J. *et al.* Holocranohistochemistry enables the visualization of alpha-synuclein  
550 expression in the murine olfactory system and discovery of its systemic anti-microbial effects. *J*  
551 *Neural Transm (Vienna)* **124**, 721-738, doi:10.1007/s00702-017-1726-7 (2017).
- 552 28 Stolzenberg, E. *et al.* A Role for Neuronal Alpha-Synuclein in Gastrointestinal Immunity. *J*  
553 *Innate Immun*, doi:10.1159/000477990 (2017).
- 554 29 Mizuta, I. *et al.* YY1 binds to alpha-synuclein 3'-flanking region SNP and stimulates antisense  
555 noncoding RNA expression. *J Hum Genet* **58**, 711-719, doi:10.1038/jhg.2013.90 (2013).
- 556 30 Elkouris, M. *et al.* Long Non-coding RNAs Associated With Neurodegeneration-Linked Genes  
557 Are Reduced in Parkinson's Disease Patients. *Front Cell Neurosci* **13**, 58,  
558 doi:10.3389/fncel.2019.00058 (2019).
- 559 31 Villegas, V. E. & Zaphiropoulos, P. G. Neighboring gene regulation by antisense long non-  
560 coding RNAs. *Int J Mol Sci* **16**, 3251-3266, doi:10.3390/ijms16023251 (2015).
- 561 32 Dunn, A. R. *et al.* Synaptic vesicle glycoprotein 2C (SV2C) modulates dopamine release and is  
562 disrupted in Parkinson disease. *Proc Natl Acad Sci U S A*, doi:10.1073/pnas.1616892114 (2017).
- 563 33 Chartier-Harlin, M. C. *et al.* Alpha-synuclein locus duplication as a cause of familial Parkinson's  
564 disease. *Lancet* **364**, 1167-1169, doi:10.1016/S0140-6736(04)17103-1 (2004).
- 565 34 Sulzer, D. *et al.* T cells from patients with Parkinson's disease recognize alpha-synuclein  
566 peptides. *Nature* **546**, 656-661, doi:10.1038/nature22815 (2017).
- 567 35 Schonhoff, A. M., Williams, G. P., Wallen, Z. D., Standaert, D. G. & Harms, A. S. Innate and  
568 adaptive immune responses in Parkinson's disease. *Prog Brain Res* **252**, 169-216,  
569 doi:10.1016/bs.pbr.2019.10.006 (2020).
- 570 36 Hamza, T. H. *et al.* Common genetic variation in the HLA region is associated with late-onset  
571 sporadic Parkinson's disease. *Nat Genet* **42**, 781-785 (2010).
- 572 37 Svensson, E. *et al.* Vagotomy and subsequent risk of Parkinson's disease. *Ann Neurol* **78**, 522-  
573 529, doi:10.1002/ana.24448 (2015).

- 574 38 Liu, B. *et al.* Vagotomy and Parkinson disease: A Swedish register-based matched-cohort study.  
575 *Neurology* **88**, 1996-2002, doi:10.1212/WNL.0000000000003961 (2017).
- 576 39 Matheoud, D. *et al.* Intestinal infection triggers Parkinson's disease-like symptoms in Pink1(-/-)  
577 mice. *Nature* **571**, 565-569, doi:10.1038/s41586-019-1405-y (2019).
- 578 40 Gibb, W. R. & Lees, A. J. A comparison of clinical and pathological features of young- and old-  
579 onset Parkinson's disease. *Neurology* **38**, 1402-1406, doi:10.1212/wnl.38.9.1402 (1988).
- 580 41 Hill-Burns, E. M. *et al.* Parkinson's disease and Parkinson's disease medications have distinct  
581 signatures of the gut microbiome. *Mov Disord* **32**, 739-749, doi:10.1002/mds.26942 (2017).
- 582 42 Bolyen, E. *et al.* Reproducible, interactive, scalable and extensible microbiome data science using  
583 QIIME 2. *Nat Biotechnol* **37**, 852-857, doi:10.1038/s41587-019-0209-9 (2019).
- 584 43 Callahan, B. J. *et al.* DADA2: High-resolution sample inference from Illumina amplicon data.  
585 *Nat Methods* **13**, 581-583, doi:10.1038/nmeth.3869 (2016).
- 586 44 Chang, C. C. *et al.* Second-generation PLINK: rising to the challenge of larger and richer  
587 datasets. *Gigascience* **4**, 7, doi:10.1186/s13742-015-0047-8 (2015).
- 588 45 Deelen, P. *et al.* Genotype harmonizer: automatic strand alignment and format conversion for  
589 genotype data integration. *BMC Res Notes* **7**, 901, doi:10.1186/1756-0500-7-901 (2014).
- 590 46 Das, S. *et al.* Next-generation genotype imputation service and methods. *Nat Genet* **48**, 1284-  
591 1287, doi:10.1038/ng.3656 (2016).
- 592 47 Taliun, D. *et al.* Sequencing of 53,831 diverse genomes from the NHLBI TOPMed Program.  
593 *bioRxiv*, 563866, doi:10.1101/563866 (2019).
- 594 48 Han, B. & Eskin, E. Random-effects model aimed at discovering associations in meta-analysis of  
595 genome-wide association studies. *American journal of human genetics* **88**, 586-598,  
596 doi:10.1016/j.ajhg.2011.04.014 (2011).
- 597 49 Pruim, R. J. *et al.* LocusZoom: regional visualization of genome-wide association scan results.  
598 *Bioinformatics* **26**, 2336-2337 (2010).

599 50 Machiela, M. J. & Chanock, S. J. LDlink: a web-based application for exploring population-  
600 specific haplotype structure and linking correlated alleles of possible functional variants.  
601 *Bioinformatics* **31**, 3555-3557, doi:10.1093/bioinformatics/btv402 (2015).

602

603

**Table 1.** Increased abundance of opportunistic pathogens in PD gut microbiome is dependent on the host genotype.

|                                    | PD           | Cont | OR  | [95%CI]   | P    | PD            | Cont | OR  | [95%CI]    | P    | PD            | Cont | OR  | [95%CI]    | P    |               |    |      |              |      |
|------------------------------------|--------------|------|-----|-----------|------|---------------|------|-----|------------|------|---------------|------|-----|------------|------|---------------|----|------|--------------|------|
| <b>a) <i>Corynebacterium_1</i></b> |              |      |     |           |      |               |      |     |            |      |               |      |     |            |      |               |    |      |              |      |
|                                    | All subjects |      |     |           |      | rs356229_TT   |      |     |            |      | rs356229_TC   |      |     |            |      | rs356229_CC   |    |      |              |      |
| Dataset 1                          | 199          | 117  | 1.5 | [1.1-2.1] | 0.02 | 64            | 53   | 1.0 | [0.6-1.8]  | 0.90 | 90            | 48   | 1.7 | [1.1-2.7]  | 0.03 | 45            | 16 | 2.6  | [0.9-7.2]    | 0.08 |
| Dataset 2                          | 312          | 174  | 1.7 | [1.0-2.9] | 0.05 | 107           | 66   | 0.8 | [0.3-2.1]  | 0.70 | 150           | 80   | 2.6 | [1.2-5.4]  | 0.01 | 55            | 28 | 2.3  | [0.6-8.5]    | 0.21 |
| Meta-analysis                      | 511          | 291  | 1.6 | [1.2-2.1] | 3E-3 | 171           | 119  | 1.0 | [0.6-1.6]  | 0.92 | 240           | 128  | 1.9 | [1.3-2.8]  | 1E-3 | 100           | 44 | 2.5  | [1.1-5.6]    | 0.03 |
| <b>b) <i>Porphyromonas</i></b>     |              |      |     |           |      |               |      |     |            |      |               |      |     |            |      |               |    |      |              |      |
|                                    | All subjects |      |     |           |      | rs10029694_GG |      |     |            |      | rs10029694_GC |      |     |            |      | rs10029694_CC |    |      |              |      |
| Dataset 1                          | 199          | 117  | 2.1 | [1.4-3.2] | 4E-4 | 154           | 94   | 1.5 | [1.0-2.4]  | 0.06 | 43            | 22   | 5.2 | [2.0-13.8] | 1E-3 | 2             | 1  | 64.3 | [0.6-7155.8] | 0.33 |
| Dataset 2                          | 312          | 174  | 1.9 | [1.2-3.1] | 7E-3 | 251           | 142  | 1.6 | [1.0-2.7]  | 0.06 | 57            | 28   | 3.4 | [0.9-12.6] | 0.07 | 4             | 4  | 48.1 | [1.1-2125.6] | 0.12 |
| Meta-analysis                      | 511          | 291  | 2.0 | [1.5-2.8] | 7E-6 | 405           | 236  | 1.6 | [1.1-2.2]  | 7E-3 | 100           | 50   | 4.5 | [2.1-9.8]  | 2E-4 | 6             | 5  | 53.9 | [2.8-1032.6] | 8E-3 |
| <b>c) <i>Prevotella</i></b>        |              |      |     |           |      |               |      |     |            |      |               |      |     |            |      |               |    |      |              |      |
|                                    | All subjects |      |     |           |      | rs6856813_TT  |      |     |            |      | rs6856813_TC  |      |     |            |      | rs6856813_CC  |    |      |              |      |
| Dataset 1                          | 199          | 117  | 2.1 | [1.4-3.2] | 9E-4 | 72            | 48   | 2.6 | [1.4-4.7]  | 3E-3 | 91            | 57   | 1.6 | [0.9-3.0]  | 0.12 | 36            | 12 | 1.8  | [0.4-8.7]    | 0.49 |
| Dataset 2                          | 312          | 174  | 2.4 | [1.5-3.8] | 2E-4 | 119           | 69   | 5.6 | [2.7-11.8] | 1E-5 | 143           | 77   | 1.9 | [1.0-3.7]  | 0.05 | 50            | 28 | 0.8  | [0.3-2.1]    | 0.60 |
| Meta-analysis                      | 511          | 291  | 2.2 | [1.6-3.0] | 4E-7 | 191           | 117  | 3.5 | [2.2-5.7]  | 2E-7 | 234           | 134  | 1.8 | [1.1-2.8]  | 0.01 | 86            | 40 | 1.0  | [0.4-2.3]    | 0.95 |

Testing the abundances of three taxa in PD vs. control. a) *Corynebacterium\_1*, b) *Porphyromonas*, and c) *Prevotella* (as defined by SILVA taxonomic database) were elevated in PD gut microbiome, as reported previously<sup>11</sup>, and shown here in the first panel (all subjects). The differential abundance was then tested within each genotype of the interacting SNP. Results are consistent across the two datasets and summarized by meta-analysis, showing differential abundance of opportunistic pathogens in PD is genotype-dependent. PD: number of subjects with Parkinson's disease; Cont: number of control subjects; OR [95%CI]: odds ratio and 95% confidence interval estimating the fold-change in clr-transformed taxa abundance in PD vs. control; P: statistical significance. Clr-transformed abundance of each taxon was tested in PD vs controls using linear regression adjusted for sex and age. Formal test of heterogeneity across datasets revealed no heterogeneity, thus fixed-model was used for meta-analysis.

**Table 2.** Characteristics of the interacting variants at *SNCA* locus

| PD-associated taxa       | Interacting SNP at <i>SNCA</i> region | Interaction <i>P</i> | Effect allele | Effect allele freq. | a. Association of effect allele with PD |          |               | b. Association of interacting SNP with gene expression |                      |                |                  |         |     |     |      |    |                      |      |      |      |
|--------------------------|---------------------------------------|----------------------|---------------|---------------------|-----------------------------------------|----------|---------------|--------------------------------------------------------|----------------------|----------------|------------------|---------|-----|-----|------|----|----------------------|------|------|------|
|                          |                                       |                      |               |                     | Present study OR                        | <i>P</i> | pdgene.org OR | <i>P</i>                                               | Gene                 | eQTL <i>P</i>  | Tissue studied   | Source  |     |     |      |    |                      |      |      |      |
| <i>Corynebacterium</i> 1 | rs356229_T/C                          | 2E-03                | C             | 0.4                 | 1.3                                     | 0.04     | 1.3           | 3E-42                                                  | <i>SNCA</i>          | 1E-13          | Whole blood      | eQTLGen |     |     |      |    |                      |      |      |      |
|                          |                                       |                      |               |                     |                                         |          |               |                                                        | <i>SNCA</i>          | 9E-5           | Esophagus mucosa | GTEX    |     |     |      |    |                      |      |      |      |
|                          |                                       |                      |               |                     |                                         |          |               |                                                        | <i>SNCA-AS1</i>      | 2E-7           | Pituitary        | GTEX    |     |     |      |    |                      |      |      |      |
|                          |                                       |                      |               |                     |                                         |          |               |                                                        | <i>RP11-115D19.1</i> | 3E-14          | Skin             | GTEX    |     |     |      |    |                      |      |      |      |
|                          |                                       |                      |               |                     |                                         |          |               |                                                        | <i>MMRNI</i>         | 5E-5           | Spleen           | GTEX    |     |     |      |    |                      |      |      |      |
|                          |                                       |                      |               |                     |                                         |          |               |                                                        | <i>MMRNI</i>         | 4E-9           | Whole Blood      | eQTLGen |     |     |      |    |                      |      |      |      |
|                          |                                       |                      |               |                     |                                         |          |               |                                                        | <i>Porphyromonas</i> | rs10029694_G/C | 6E-03            | C       | 0.1 | 1.1 | 0.62 | NS | <i>RP11-115D19.1</i> | 1E-5 | Skin | GTEX |
|                          |                                       |                      |               |                     |                                         |          |               |                                                        | <i>RP11-115D19.2</i> |                |                  |         |     |     |      |    | 7E-6                 | Skin | GTEX |      |
|                          |                                       |                      |               |                     |                                         |          |               |                                                        | <i>Prevotella</i>    |                |                  |         |     |     |      |    | rs6856813_T/C        | 0.01 | T    | 0.6  |
|                          |                                       |                      |               |                     |                                         |          |               |                                                        | <i>SNCA</i>          | 2E-5           | Artery-Tibial    | GTEX    |     |     |      |    |                      |      |      |      |
| <i>SNCA</i>              | 1E-4                                  | Artery-Aorta         | GTEX          |                     |                                         |          |               |                                                        |                      |                |                  |         |     |     |      |    |                      |      |      |      |
|                          |                                       |                      |               |                     |                                         |          |               | <i>MMRNI</i>                                           | 3E-11                | Whole blood    | eQTLGen          |         |     |     |      |    |                      |      |      |      |

Test of statistical interaction nominated three different and independent single nucleotide variants (SNPs) at *SNCA* region as modifiers of the relative increase of three opportunistic pathogens in PD gut microbiome. (a) One of the variants is directly associated with PD (i.e., main effect as well as interaction); other two have no detectable main effect. (b) All three SNPs are expression quantitative loci (eQTL) for *SNCA*, lncRNA anti-sense to *SNCA* known to regulate *SNCA* expression (*SNCA-AS1*, *RP11-115D19.1*), lncRNA *RP11-115D19.2* which is embedded in and antisense to *SNCA*, and *MMRNI*, a protein coding gene (mutimerin 1) upstream of 5' *SNCA* which is often multiplied along with *SNCA* multiplication in familial PD. Data were obtained from eQTL databases GTEx and eQTLGen. Important to note that the names of genera are not standardized across reference databases and caution should be exercised when comparing results from different studies; these genera were defined using SILVA reference database. Effect allele: variant of interacting SNP that is associated with increased differential abundance of the taxon in PD vs. controls. pdgene.org: catalogue of PD associated genes. NS: not associated with PD in pdgene database. *RP11-115D19.1* is denoted as *AC093866.1* in Fig 1, *RP11-115D19.2* is denoted as *AC097478.2* in Fig 1.



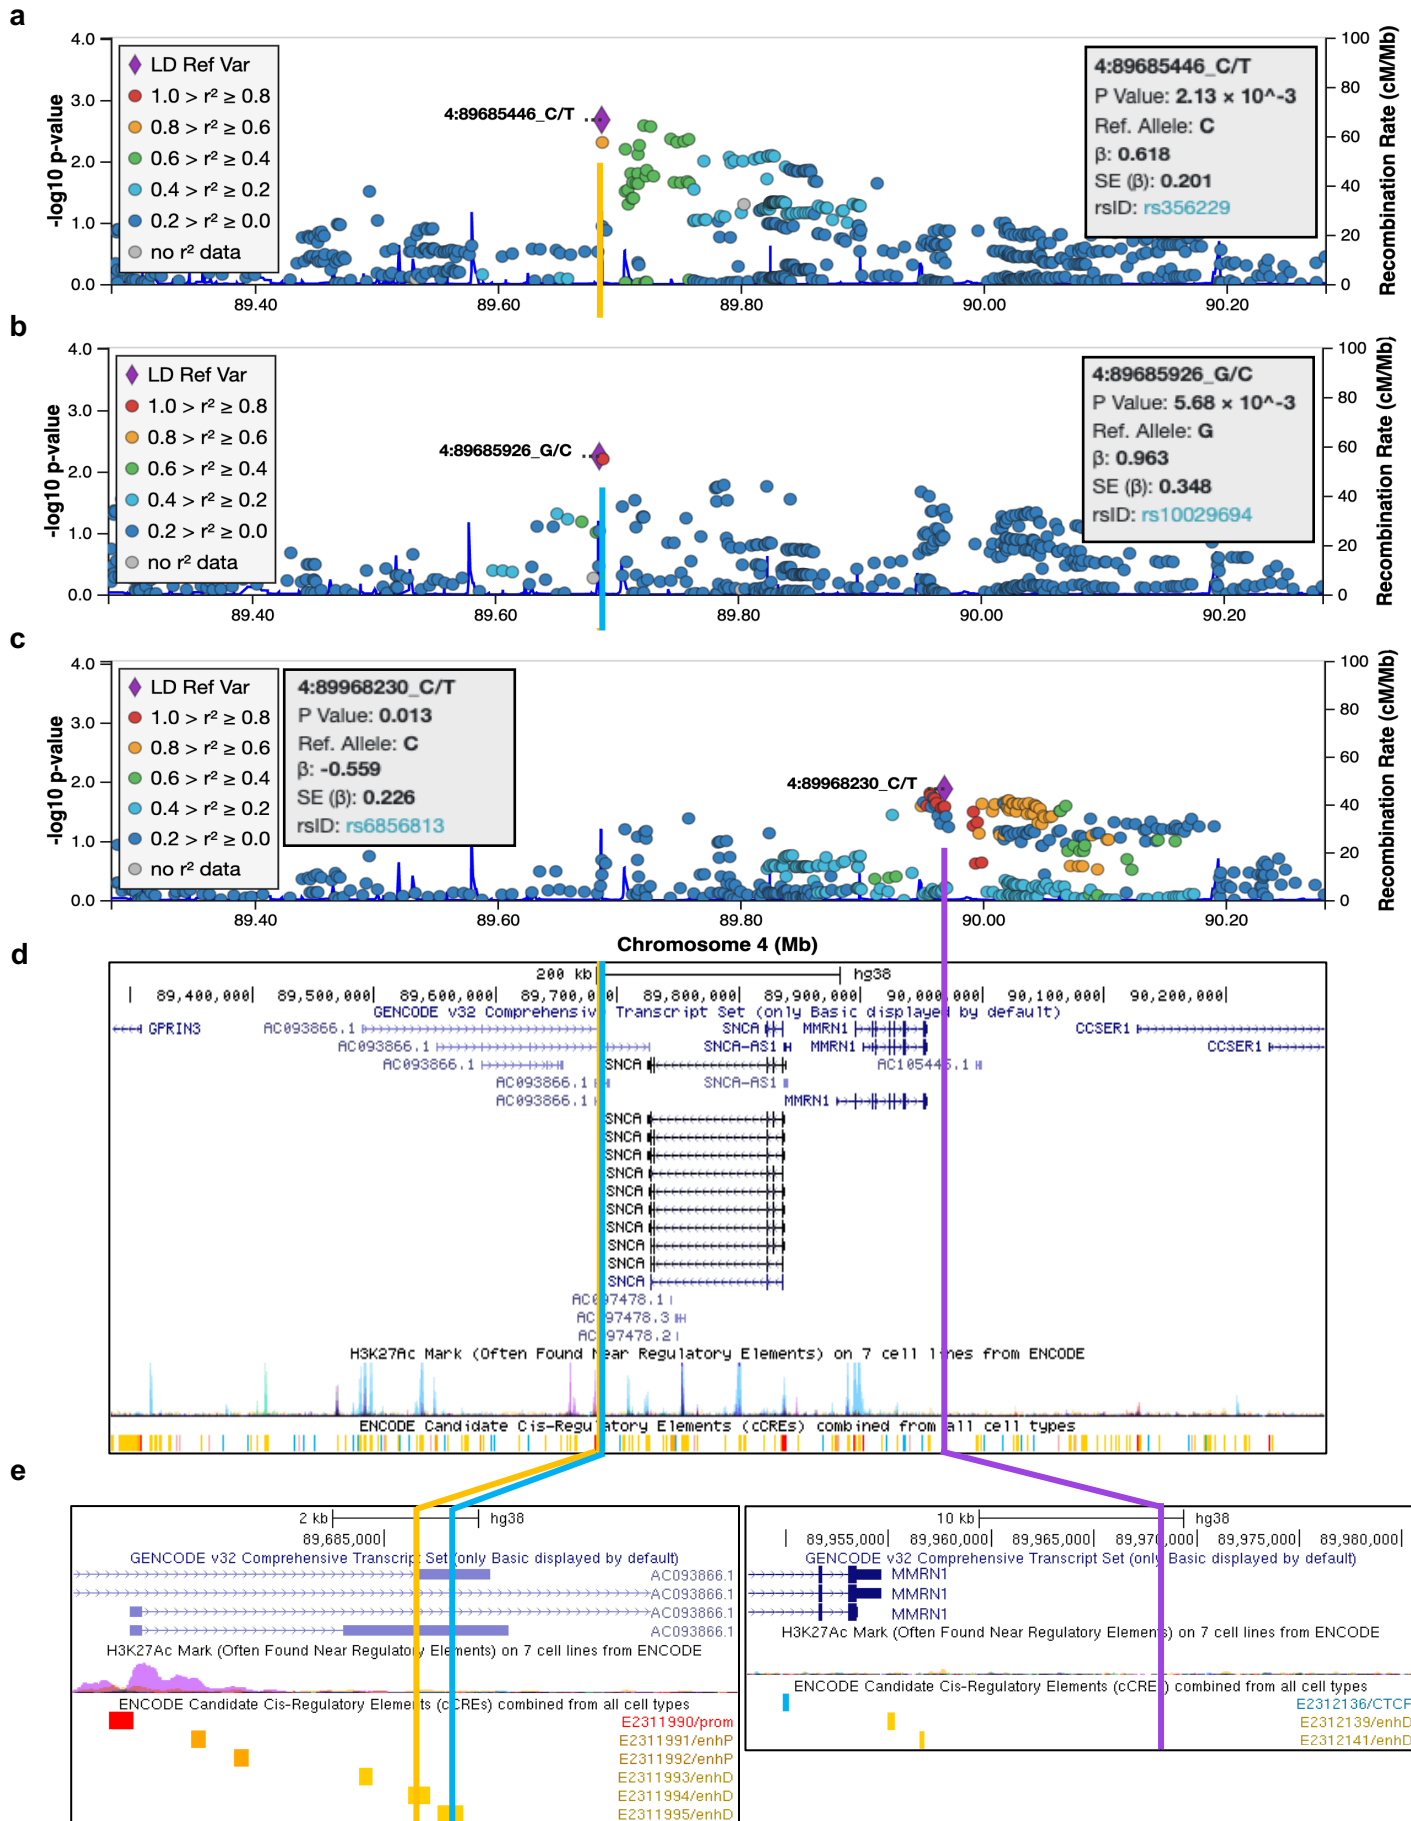

**Fig. 1:** Genetic map of candidate interacting SNPs.

SNPs in *SNCA* region (chromosome 4: 88.9 Mb – 90.6 Mb) were tested for interaction on the association of three taxa with PD. Results are shown in LocusZoom, where each SNP is plotted according to its base pair position and meta-analysis  $-\log_{10}(P \text{ value})$  for interaction for the three taxa: (a) *Corynebacterium\_1*, (b) *Porphyromonas*, and (c) *Prevotella*. The SNP with the highest significance is shown as a purple diamond, and was chosen as candidate interacting SNP for stratified analysis (Table 1). (d) UCSC Genome Browser shows the interacting SNPs for *Corynebacterium\_1* and *Porphyromonas* map to 3' *SNCA* in a lncRNA that overlaps with and are antisense to *SNCA*. The interacting SNP for *Prevotella* is distal at 5' of *SNCA* and *MMRNI*. (e) The interacting SNPs for *Corynebacterium\_1* and *Porphyromonas*, while only 450 base pair apart, are not in LD ( $R^2=0$ ) and map to adjacent regulatory sequences shown in yellow bars. The interacting SNP for *Prevotella* does not map to any known functional sequence. All three SNPs are eQTLs for *SNCA* and lncRNA genes *SNCA-AS1*, *RP11-115D19.1 (AC093866.1)*, and *RP11-115D19.2 (AC097478.2)* which are associated with expression of *SNCA* (Table 2).

LD: linkage disequilibrium; Mb: Megabase; P value: *P* value from meta-analysis;  $\beta$ : beta coefficient of interaction from meta-analysis; SE: standard error; rsID: reference SNP ID for the marked SNP.

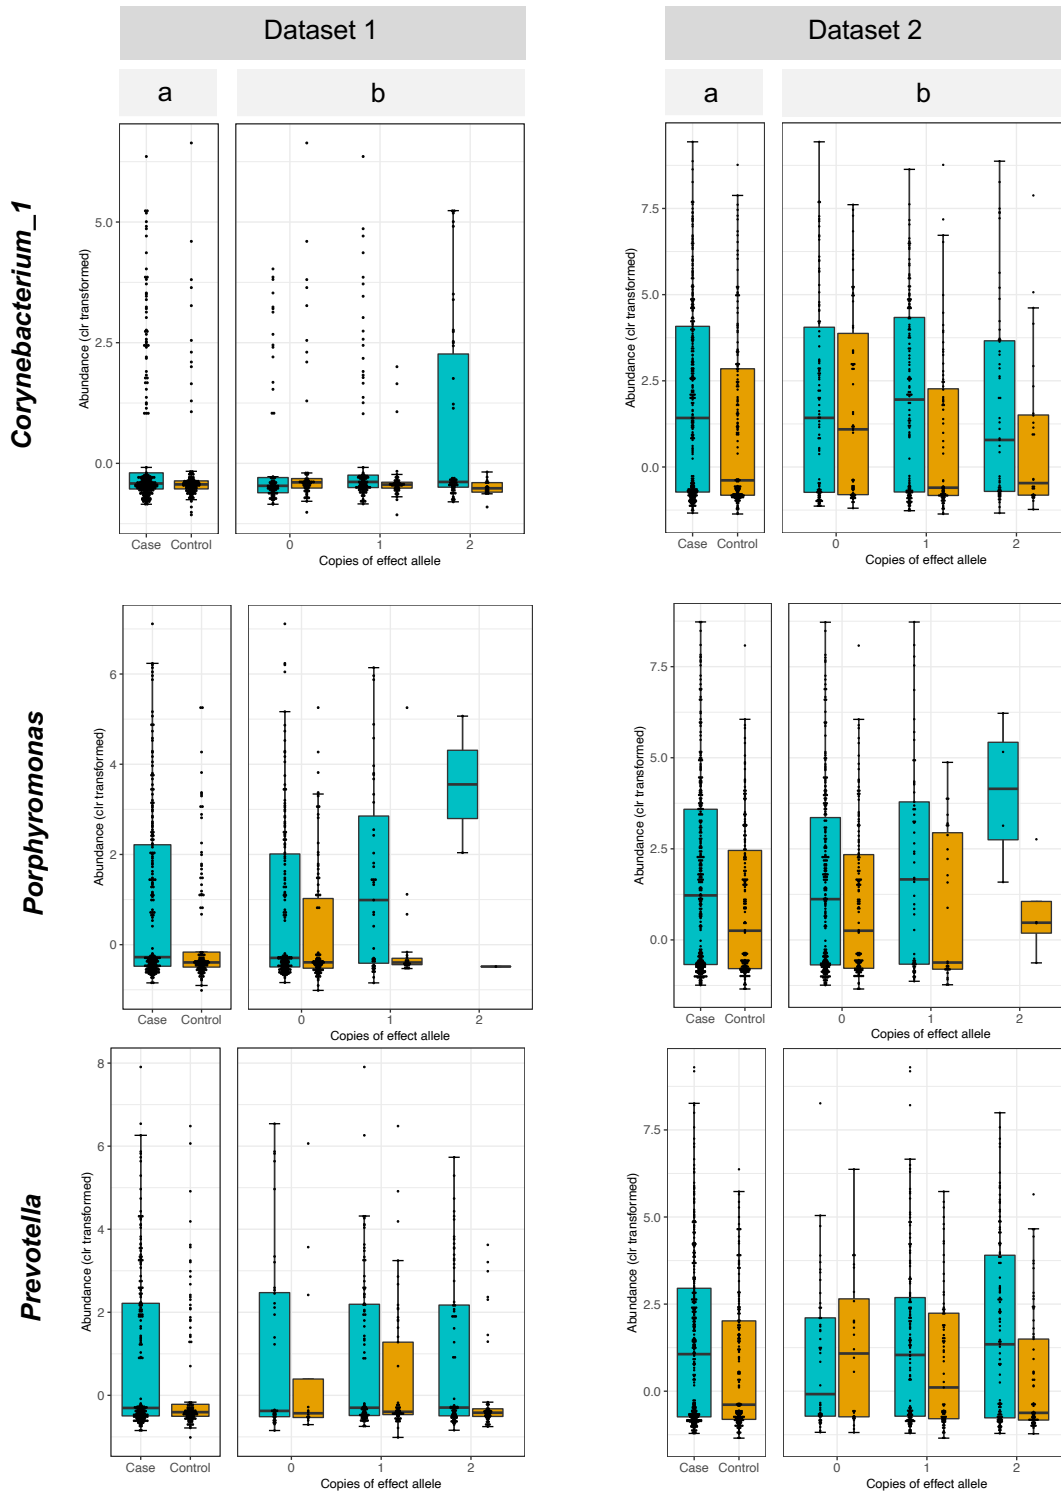

**Fig. 2:** Differential abundance of opportunistic pathogens.

Clr-transformed abundances of each taxon is plotted for PD cases (blue) and controls (orange) for all subjects irrespective of genotype (panel a) and stratified for the three genotypes of the interacting SNP (panel b). The two datasets show the same pattern of interaction where the difference between PD and controls in the abundances of each taxon becomes larger with increasing number of the effect allele.

Dataset 2 has higher resolution than dataset 1 (particularly for *Corynebacterium\_1* which is rare) because it had 10x greater sequencing depth.
